# Supplementary material
Source: publisher site journal article supplement (https://www.dovepress.com/article/395255)
Supplement: Supplementary file 1 [file get_supplementary_file.php]

# Supplementary Material

# Wee et al., *Life engagement improvement following initiation of Brexpiprazole treatment in MDD patients: A retrospective real-world study*

# Section S1: Clinical labels derived from the Mental Status Examination (MSE)

The Mental Status Examination (MSE) is a structured way of observing and describing a patient’s current mental state in psychiatric practice. Prior work developed an NLP model that extracts 241 clinical features or labels that span a patient’s mental state (Mukherjee et al., 2020). The MSE information recorded may differ from institution to institution; there are instances of redundancy and conflicts between some of these 241 labels. For example, information about a patient’s affect is mainly captured within the ‘Affect’ category. However, the ‘Appearance’ category also contains the label ‘Issues with Affect’, as the observation of a patient’s affect comes partially from the patient’s appearance. This potentially results in conflicts, as the same behavioral trait may be encoded differently in different parts of the 241 labels. For example, the aforementioned ‘Appearance’ category may be labelled to represent that the patient does not exhibit issues with affect, while the features within the ‘Affect’ category may be labelled such that the patient’s affect does appear to be non-normal. Such conflicting encoding is detrimental to downstream analysis.

Furthermore, many factors are representative of different degrees of the same information. For example, the ‘Affect’ of a person may refer to the states: “Labile”, “Blunted/restricted/psychomotor constricted”, “Ok”, “Intense affect”, “Flooded”. Although these all represent the same physical quantity, the 241 labels represent them by different binary digits, allowing for having multiple affective presentations simultaneously, which is physiologically not meaningful.

For computational efficacy, the labels were consolidated into a psychiatrically meaningful but smaller vector of numbers while also alleviating some of the problems mentioned above with the usage of all 241 labels. Using a many-to-one mapping and further transformation, the set of unmapped clinical labels were mapped into a reduced set of clinical labels comprising of 18 categories to better represent the spectrum of life engagement outcomes in a patient. This reduced set of labels have been designed with the mental health assessment criterion and the evaluation of life engagement in mind after consultation with leading authorities in psychiatry. Within these 18 categories, the clinical labels can be represented either as binary values, indicating the absence or presence of a clinical feature or an ordinal value, to represent the valence and severity of a clinical feature.

The smaller set of labels were standardized such that a value of 0 implies the clinical feature either has no issues or is unable to be categorized. Some clinical labels within the 241 labels were not mapped into the reduced set of labels (i.e., a value of 1 or 0 within the labels in Supplementary Table 1 was not mapped to any label within the reduced set of labels).

**Supplementary Table 1**List of neutral or ambiguous clinical labels that were not mapped to the smaller set of labels

| **Clinical label** |
| --- |
| Abnormal or psychotic thoughts - no issues |
| Abnormal or psychotic thoughts - neutral/unable to categorize |
| Affect - no issues/appropriate affect |
| Affect - neutral/unable to categorize |
| Appearance - Sleep/Bed |
| Appearance - Positive Affect |
| Appearance - Issues with Weight |
| Appearance - Normal/no issues |
| Appearance - Neutral |
| Appearance - Appropriate Age |
| Association - intact/no issues |
| Association - neutral/unable to categorize |
| Attention/Concentration - intact/no issues |
| Attention/Concentration - neutral/unable to categorize |
| Attitude - neutral/unable to categorize |
| Cognition - normal/no issues |
| Cognition - neutral/unable to categorize |
| Executive Functioning - intact/no issues |
| Executive Functioning - neutral/unable to categorize |
| Executive Functioning - age-appropriate |
| Fund of knowledge - intact/no issues |
| Fund of knowledge - neutral/unable to categorize |
| Fund of knowledge - positive vocabulary |
| Fund of knowledge - positive history |
| Fund of knowledge - average |
| Fund of knowledge - positive current events |
| Fund of knowledge - improved |
| Gait and station - normal/no issues |
| Gait and station - neutral/unable to categorize |
| Homicidal - not present |
| Homicidal - neutral |
| Impulse control - good/no issues |
| Impulse control - neutral/unable to categorize |
| Impulse control - age-appropriate |
| Insight - no issues with insight |
| Insight - neutral/unable to categorize |
| Intelligence - normal/no issues with intelligence |
| Intelligence - neutral/unable to categorize |
| Judgment - no issues with judgment |
| Judgment - issues with judgment |
| Judgment - neutral/unable to categorize |
| Language - intact |
| Language - neutral/unable to categorize |
| Language - repetition intact |
| Language - object naming intact |
| Level of consciousness - normal; no issues notes |
| Level of consciousness - neutral; unable to categorize |
| Memory - no issues/memory unimpaired |
| Memory - neutral/unable to categorize |
| Mood - Normal; no issues |
| Mood - neutral; unable to categorize |
| Orientation - no orientation issues |
| Orientation - neutral/unable to categorize |
| Psychomotor - normal; no issues |
| Psychomotor - neutral; unable to categorize |
| Psychomotor - improved |
| Reasoning - normal; no issues |
| Reasoning - neutral; unable to categorize |
| Sensorium - normal; no issues |
| Sensorium - neutral; unable to categorize |
| Sleep - “normal, no issues” |
| Sleep - “neutral, unable to categorize” |
| Speech - “normal, no issues” |
| Speech - “neutral, unable to categorize” |
| Speech - improved |
| Suicidal - “normal, no issues, not present” |
| Suicidal - “neutral, unable to categorize” |
| Violent Thoughts - “normal, no issues” |
| Violent Thoughts - “neutral, unable to categorize” |

In addition, some of the 241 labels did not fit into any of the four domains defined within the life engagement concept. These labels are listed in Supplementary Table 2.

**Supplementary Table 2**List of clinical labels not mapped due to lack of suitability against the life engagement domains

| **Clinical label** |
| --- |
| Abnormal or psychotic thoughts - experiencing delusions/abnormal thoughts (grandeur) |
| Abnormal or psychotic thoughts - experiencing delusions/abnormal thoughts (persecution) |
| Abnormal or psychotic thoughts - experiencing delusions/abnormal thoughts (religious) |
| Abnormal or psychotic thoughts - experiencing hallucinations (auditory) |
| Abnormal or psychotic thoughts - experiencing hallucinations (visual) |
| Abnormal or psychotic thoughts - experiencing hallucinations (tactile) |
| Abnormal or psychotic thoughts - History of delusions/abnormal thoughts |
| Abnormal or psychotic thoughts - History of hallucinations |
| Abnormal or psychotic thoughts - experiencing delusions (not specified) |
| Abnormal or psychotic thoughts - experiencing hallucinations (not specified) |
| Abnormal or psychotic thoughts - experiencing delusions/abnormal thoughts (obsessions) |
| Abnormal or psychotic thoughts - experiencing delusions/abnormal thoughts (paranoia) |
| Abnormal or psychotic thoughts - experiencing hallucinations (olfactory) |
| Abnormal or psychotic thoughts - responding to internal stimuli |
| Abnormal or psychotic thoughts - experiencing delusions/abnormal thoughts (sexual) |
| Homicidal - present |
| Mood - suicidal |
| Suicidal - suicidal ideation |
| Suicidal - suicidal with intent |
| Suicidal - suicidal with plan |
| Suicidal - suicide attempt |
| Suicidal - history of ideation |
| Suicidal - history of attempt |
| Suicidal - self-injurious |
| Suicidal - history of self injury |
| Suicidal - suicidal ideation with means |
| Violent Thoughts - present |
| Violent Thoughts - “present, with intent” |
| Violent Thoughts - present with plan |
| Violent Thoughts - present with means |
| Violent Thoughts - history of violent thoughts |
| Violent Thoughts - history of violent behaviors |
| Violent Thoughts - violent/aggressive behavior |

As mentioned above, a primary reason for the many-to-one mapping happens because the same information within the smaller set of clinical labels was encoded in multiple locations within the unmapped clinical labels. Under these circumstances, it is important to determine which of the multiple values within the unmapped clinical labels related to the single number in the smaller set would be preferentially used for encoding the specific value. To solve this issue, we consider the severity of the condition that was being mapped within a subcategory by transforming the binary 241 labels into ordinal values for specific categories where the mapped labels represent the severity of the condition that was being mapped. For comprehensive mapping rules to be generated, it is imperative that many-to-one binary mapping rules for both binary and ordinal values are created.

Mappings to a binary-encoded value within the reduced set of clinical labels were first considered. Consider one of the clinical labels within the reduced set, representing “general issues with the dress of the individual”. Three different clinical labels within the unmapped set were mapped into this single clinical feature. These are “Appearance - Not age-appropriate,” “Appearance - Hospital attire,” and “Appearance - Issues with dress” among the 241 labels. As long as any of these 3 labels are present, the clinical label within the reduced set will be set to 1, indicating the presence of this clinical feature.

Next, we consider the mappings for clinical features represented by an ordinal scale. In this case, we consider the information present in one of the 18 categories in the smaller set of labels that define the “Mood”. Within the smaller set of clinical labels, the “Mood” category is represented as values between -1 and 4, which represent different mental states of a patient’s mood:

- A value of -1 means a patient’s mood has improved
- A value of 0 means a patient’s mood is normal
- A value of 1 means a patient’s mood is either anxious or fearful
- A value of 2 means a patient’s mood is agitated or restless
- A value of 3 means a patient’s mood is irritable or angry
- A value of 4 means a patient’s mood is aggressive

For this category, a many-to-one mapping exists which maps one or more labels from the unmapped clinical labels to an ordinal value, representing the severity of the information. Consider a patient who was presented with the unmapped clinical labels “Mood - aggressive”, “Psychomotor - agitated/ tense/ restless”, “Mood – anxious/tense”. These labels translate to an ordinal value of 4, 2, and 1, respectively, within the mapped ordinal scale. For circumstances such as these, we use the clinical feature with the highest severity, as being aggressive is the more informative behavior about the severity of the person's mental condition.

The 18 categories contain 86 unique binary and ordinal values, which were converted into a binary variable for the study, indicating the presence of the condition indicated by the clinical label. Weights were then assigned to each of the 86 labels from discussions with key opinion leaders, including psychiatrists, on how each label impacts life engagement. Supplementary Table 3 shows the mapping of the original 241 clinical labels into the 86 labels used in the present study, while Supplementary Table 4 describes the 86 unique labels, their meaning, the life engagement domain they belong to, and the weight associated with the life engagement score.

**Supplementary Table 3**Mapping of the 241 clinical labels originally derived from the MSE into the reduced set of 86 labels

| **Category** | **Subcategory** | **Mapped Clinical Label** | **Unmapped clinical label** | **Mapped value** |
| --- | --- | --- | --- | --- |
| Mood | Mood | Improved | Mood - improved | **-1** |
| Anxious/ fearful/ declined | Affect - anxious/ fearful | 1 |
| Anxious/ fearful/ declined | Mood - declined | 1 |
| Anxious/ fearful/ declined | Mood - misc. Issues | 1 |
| Anxious/ fearful/ declined | Mood - anxious/ tense | 1 |
| Agitated/ restless | Psychomotor - agitated/ tense/ restless | 2 |
| Irritable/ angry | Affect - irritable/ angry | 3 |
| Irritable/ angry | Mood - irritable/ angry | 3 |
| Aggressive | Affect - Aggressive | 4 |
| Energy | Energy | Tearful/ depressed/ sad | Affect - tearful/ depressed/ sad | -1 |
| Tearful/ depressed/ sad | Mood - depressed/ sad/ despondent | -1 |
| Bright/positive | Affect - bright/positive | 1 |
| Expansive/ overly animated | Affect - expansive/ overly animated | 2 |
| Expansive/ overly animated | Mood - elevated/ manic | 2 |
| Attitude | Attitude | Bad/ inappropriate/ declined | Attitude - negative/ inappropriate | -1 |
| Bad/ inappropriate/ declined | Attitude - not age-appropriate | -1 |
| Bad/ inappropriate/ declined | Attitude - declined | -1 |
| Good/ positive/ improved | Attitude - positive/ appropriate | 1 |
| Good/ positive/ improved | Attitude - age-appropriate | 1 |
| Good/ positive/ improved | Attitude – improved | 1 |
| Affect | Affect | Labile | Affect - labile | -2 |
| Labile | Mood - labile | -2 |
| Blunted/ constricted/ inappropriate | Affect - blunted/ restricted | -1 |
| Blunted/ constricted/ inappropriate | Appearance - issues with affect | -1 |
| Blunted/ constricted/ inappropriate | Affect - generally odd or out of the ordinary/inappropriate | -1 |
| Blunted/ constricted/ inappropriate | Psychomotor - constricted | -1 |
| Good/ improved | Affect - improved from last visit | 1 |
| Reactive | Affect - reactive | 2 |
| Intense | Affect - intense | 3 |
| Flooded | Affect - flooded | 4 |
| Appearance | Low energy | Present | Affect - loss of energy/ tiredness | 1 |
| Eye contact | Good | Appearance - Positive eye contact | 1 |
| Bad | Appearance - Issues with eye contact | -1 |
| General health | Good | Appearance - Positive health | 1 |
| Bad | Appearance - Issues with general Health | -1 |
| General behavior | Good | Appearance - Positive Behaviour | 1 |
| Bad | Appearance - Issues with behavior | -1 |
| Grooming/ Hygiene | Good | Appearance - Positive Grooming/Hygiene | 1 |
| Bad | Appearance - Issues with Grooming/ Hygiene | -1 |
| Dress | Good | Appearance - Positive dress | 1 |
| Bad | Appearance - Not age-appropriate | -1 |
| Bad | Appearance - Hospital attire | -1 |
| Bad | Appearance - issues with dress | -1 |
| Gait | Gait | Issues | Gait and station - issues with gait/station | 1 |
| Assistive device | Gait and station - assistive device needed | 2 |
| Non-ambulatory | Gait and station - non-ambulatory | 3 |
| Impulse Control | Impulse control | Some issues | Impulse control - limited/some issues | 1 |
| Serious | Impulse control - not age-inappropriate | 1 |
| Improved | Impulse control - poor/ serious issues | 2 |
| Executive function | Executive functioning | Some impairment | Executive functioning - improved since last session | -1 |
| Some impairment | Executive function - some impairment | 1 |
| Some impairment | Executive function - declined since last session | 1 |
| Some impairment | Executive function - below age level | 1 |
| Much impairment | Executive function - much impairment | 2 |
| Issues due to DD1 | Present | Executive function - impaired (due to DD1) | 1 |
| Issues due to TBI1 | Present | Executive function - impaired (due to TBI1) | 1 |
| Issues due to MH1 | Present | Executive function - impaired (due to other MH1 issue) | 1 |
| Psychomotor | Retarded | Present | Psychomotor - retarded/ slowed | 1 |
| Tremors/ ticks/ Involuntary movement | Present | Psychomotor - tremors | 1 |
| Present | Psychomotor - tics | 1 |
| Present | Psychomotor - involuntary movements | 1 |
| Misc issues | Present | Psychomotor - misc. issues | 1 |
| Present | Psychomotor - declined | 1 |
| Consciousness | Conscious | Sleepy | Level of consciousness - sleepy/drowsy | 1 |
| Sleepy | Sensorium - sleepy/lethargic | 1 |
| Impaired | Sensorium - impaired | 2 |
| Impaired | Level of consciousness – misc. issues | 2 |
| Impaired | Sensorium - fluctuating | 2 |
| Clouded | Level of consciousness - clouded | 3 |
| Clouded | Sensorium - clouded/sedate | 3 |
| Catatonic | Psychomotor - catatonic | 4 |
| Issues due to DD/MI1 | Present | Level of consciousness - impaired due to DD/MI1 | 1 |
| Present | Sensorium - impaired due to medications/drugs/alcohol | 1 |
| Orientation | Generally not ok | Present | Orientation - issues with orientation to person | 1 |
| Present | Orientation - issues with orientation to place | 1 |
| Present | Orientation - issues with orientation to time/date | 1 |
| Present | Orientation - issues with orientation to situation | 1 |
| Present | Orientation - general orientation issues | 1 |
| Person not ok | Present | Orientation - issues with orientation to person | 1 |
| Place not ok | Present | Orientation - issues with orientation to place | 1 |
| Date/time not ok | Present | Orientation - issues with orientation to time/date | 1 |
| Situation not ok | Present | Orientation - issues with orientation to situation | 1 |
| Attention/ Concentration | Attention - issues- | Improved/ appropriate | Cognition - positive attention | -1 |
| Present | Cognition - issues with attention | 1 |
| Present | Attention/Concentration - issues due to MH1 | 1 |
| Present | Attention/Concentration - issues due to DD1 | 1 |
| Concentration - issues | Present | Attention/Concentration - general issues | 1 |
| Present | Attention/Concentration - declined | 1 |
| Improved/ appropriate | Cognition - positive concentration | -1 |
| Improved/ appropriate | Attention/Concentration - improved | -1 |
| Improved/ appropriate | Attention/Concentration - age appropriate | -1 |
| Present | Attention/Concentration - varying | 1 |
| Present | Cognition - issues with concentration | 1 |
| Memory | Memory - bad | Present | Memory - issues/ memory impaired | 1 |
| Reasoning | Reasoning | Abstract | Reasoning - abstract | -2 |
| Impaired | Affect - issues with Cognition | -1 |
| Impaired | Intelligence - issues with intelligence | -1 |
| Impaired | Reasoning - impaired/poor | -1 |
| Impaired | Reasoning - misc. Issues | -1 |
| Concrete/ improved | Reasoning - improved | 1 |
| Concrete/ improved | Reasoning - concrete | 1 |
| Due to DD1 | Present | Reasoning - impaired due to DD1/cognitive issues | 1 |
| Due to MI1 | Present | Reasoning - impaired due to MI1 | 1 |
| Insight | Insight - bad | Present | Insight - issues with insight | 1 |
| Thought Process | Thought process - circumstantial | Present | Association - circumstantial | 1 |
| Thought process - loose | Present | Association - loose | 1 |
| Thought process - tangential | Present | Association - tangential | 1 |
| Thought process - disorganized | Present | Association - disorganized | 1 |
| Thought process - general issues | Improved/ appropriate | Association - improved | -1 |
| Present | Association - declined | 1 |
| Present | Association - general issues | 1 |
| Present | Cognition - general issues | 1 |
| Thought process - not age-appropriate | Present | Association - age appropriate | 0 (maps to 1 when 0) |
| Fund of Knowledge | Fund of knowledge | Bad/ inappropriate | Cognition - Issues with fund of knowledge | -1 |
| Bad/ inappropriate | Fund of knowledge - below average | -1 |
| Above average | Fund of knowledge - generally limited/issues | 1 |
| Bad/ inappropriate | Fund of knowledge - declined | -1 |
| Above average | Cognition - positive fund of knowledge, | 1 |
| Above average | Fund of knowledge - above average | 1 |
| Vocab - bad | Above average | Fund of knowledge - issues with vocabulary | 1 |
| Current events - bad | Above average | Fund of knowledge - issues with current events | 1 |
| Good history | Above average | Fund of knowledge - issues with history | 1 |
| Language | Language | Impaired | Language - impaired | 1 |
| Minimally verbal | Language - minimally verbal | 2 |
| Minimally verbal | Speech - unintelligible | 2 |
| Non-verbal | Language - non-verbal/mute | 3 |
| Non-verbal | Speech - mute/non-verbal | 3 |
| Repetition not ok | Present | Language - issues with repetition | 1 |
| Object naming not ok | Present | Language - issues with object naming | 1 |
| Issues with DD1 | Present | Language - issues related to DD1 | 1 |
| Speech | Speech - rate issues | Present | Speech - issues with rate | 1 |
| Speech - tone issues | Present | Speech - issues with tone | 1 |
| Speech - volume issues | Present | Speech - issues with volume | 1 |
| Speech - stutter/lisp | Present | Speech - stutter or lisp | 1 |
| Speech – misc. issues | Present | Level of consciousness - issues verbally | 1 |
| Present | Speech - misc. issues | 1 |
| Speech - impoverished | Present | Speech - impoverished | 1 |

1 MH = Mental Health, MI = Mental Illness, DD = Developmental Disorder, TBI = Traumatic Brain Injury

**Supplementary Table 4**Description of 86 clinical labels derived from the MSE

| **Category** | **Subcategory** | **Clinical Label** | **Domain(s)** | **Valence** | **Weight** |
| --- | --- | --- | --- | --- | --- |
| Mood | Mood | Improved | Emotional | Positive | 2 |
| Anxious/ fearful/ declined | Emotional | Negative | -1 |
| Agitated/ restless | Emotional/ Physical | Negative | -2 |
| Irritable/ angry | Emotional | Negative | -3 |
| Aggressive | Emotional | Negative | -4 |
| Energy | Energy | Tearful/ depressed/ sad | Emotional/Social | Negative | -1 |
| Bright/positive | Emotional | Positive | 1 |
| Expansive/ overly animated | Emotional | Negative | -2 |
| Attitude | Attitude | Bad/ inappropriate/ declined | Social | Negative | -1 |
| Good/ positive/ improved | Social | Positive | 1 |
| Affect | Affect | Labile | Emotional | Negative | -2 |
| Blunted/ constricted/ inappropriate | Emotional/ Physical | Negative | -1 |
| Good/ improved | Emotional | Positive | 1 |
| Reactive | Emotional | Negative | -2 |
| Intense | Emotional | Negative | -3 |
| Flooded | Emotional | Negative | -4 |
| Appearance | Low energy | Present | Physical | Negative | -1 |
| Eye contact | Bad | Social | Negative | -2 |
| Good | Social | Positive | 2 |
| General health | Bad | Physical | Negative | -1 |
| Good | Physical | Positive | 1 |
| General behavior | Bad | Social | Negative | -2 |
| Good | Social | Positive | 2 |
| Grooming/ Hygiene | Bad | Social/ Physical | Negative | -1 |
| Good | Social/ Physical | Positive | 1 |
| Dress | Bad | Social | Negative | -1 |
| Good | Social | Positive | 1 |
| Gait | Gait | Issues | Physical | Negative | -1 |
| Assistive device | Physical | Negative | -2 |
| Non-ambulatory | Physical | Negative | -3 |
| Impulse Control | Impulse control | Some issues | Emotional | Negative | -1 |
| Serious | Emotional | Negative | -2 |
| Executive Function | Executive function | Improved | Cognitive | Positive | 1 |
| Some impairment | Cognitive | Negative | -1 |
| Much impairment | Cognitive | Negative | -2 |
| Issues due to DD1 | Present | Cognitive | Negative | -1 |
| Issues due to TBI1 | Present | Cognitive | Negative | -1 |
| Issues due to MH1 | Present | Cognitive | Negative | -1 |
| Psychomotor | Retarded | Present | Cognitive | Negative | -1 |
| Tremors/ ticks/ involuntary movement | Present | Cognitive | Negative | -1 |
| Misc. issues | Present | Cognitive | Negative | -1 |
| Consciousness | Conscious | Sleepy | Physical | Negative | -1 |
| Impaired | Physical | Negative | -1 |
| Clouded | Physical | Negative | -1 |
| Catatonic | Physical | Negative | -1 |
| Issues due to DD/MI1 | Present | Physical | Negative | -1 |
| Orientation | Generally not ok | Present | Cognitive | Negative | -1 |
| Person not ok | Present | Cognitive | Negative | -1 |
| Place not ok | Present | Cognitive | Negative | -1 |
| Date/time not ok | Present | Cognitive | Negative | -1 |
| Situation not ok | Present | Cognitive | Negative | -1 |
| Attention/ Concentration | Attention- issues | Improved/ appropriate | Cognitive | Positive | 1 |
| Present | Cognitive | Negative | -1 |
| Concentration - issues | Improved/ appropriate | Cognitive | Positive | 1 |
| Present | Cognitive | Negative | -1 |
| Memory | Memory - bad | Present | Cognitive | Negative | -1 |
| Reasoning | Reasoning | Abstract | Cognitive | Negative | -2 |
| Impaired | Cognitive | Negative | -1 |
| Concrete/ improved | Cognitive | Positive | 2 |
| Issues due to DD1 | Present | Cognitive | Negative | -1 |
| Issues due to MI1 | Present | Physical | Negative | -1 |
| Insight | Insight - bad | Present | Cognitive | Negative | -1 |
| Thought Process | Circumstantial | Present | Cognitive | Negative | -1 |
| Loose | Present | Cognitive | Negative | -1 |
| Tangential | Present | Cognitive | Negative | -1 |
| Disorganized | Present | Cognitive | Negative | -1 |
| General issues | Improved/ appropriate | Cognitive | Positive | 1 |
| Present | Cognitive | Negative | -1 |
| Not age-appropriate | Present | Cognitive | Negative | -1 |
| Fund of Knowledge | Fund of knowledge | Bad/ inappropriate | Cognitive | Negative | -1 |
| Above average | Cognitive | Positive | 1 |
| Vocab - bad | Present | Cognitive | Negative | -1 |
| Current events - bad | Present | Cognitive | Negative | -1 |
| History - bad | Present | Cognitive | Negative | -1 |
| Language | Language | Impaired | Cognitive | Negative | -1 |
| Language | Minimally verbal | Cognitive | Negative | -2 |
| Language | Non-verbal | Cognitive | Negative | -3 |
| Repetition not ok | Present | Cognitive | Negative | -1 |
| Object naming not ok | Present | Cognitive | Negative | -1 |
| Issues with DD1 | Present | Cognitive | Negative | -1 |
| Speech | Rate issues | Present | Cognitive | Negative | -1 |
| Tone issues | Present | Cognitive | Negative | -1 |
| Volume issues | Present | Cognitive | Negative | -1 |
| Stutter/ lisp | Present | Cognitive | Negative | -1 |
| Misc. issues | Present | Cognitive | Negative | -1 |
| Impoverished | Present | Cognitive | Negative | -1 |

1 MH = Mental Health, MI = Mental Illness, DD = Developmental Disorder, TBI = Traumatic Brain Injury

# Section S2: Modeling methodology

The 86 clinical labels used in the present study were assessed for their relevance to life engagement outcomes. The figure below summarizes the steps performed to assess the clinical labels’ relevance to life engagement outcomes to identify the final set of clinical labels to be used for the life engagement proxy measure.

**Supplementary Figure 1**
Flowchart of MSE labels identified & selected through modeling methodology


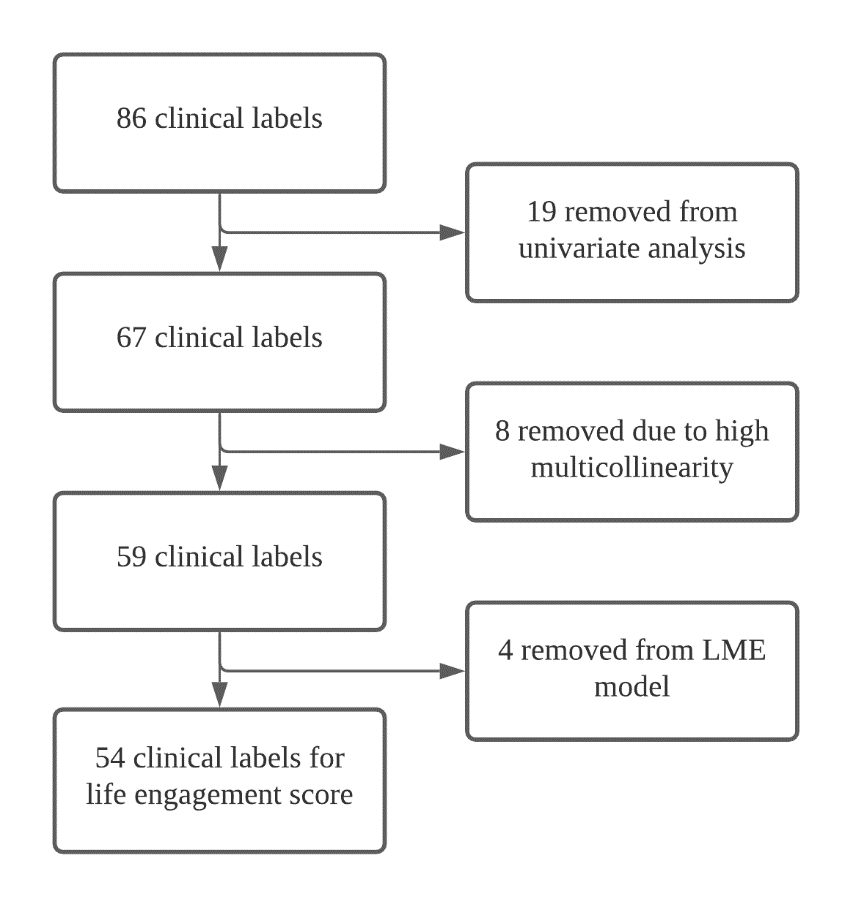


The final sample for the development of life engagement scores comprised 295,068 psychiatric patients in NeuroDB over 22 years (from January 1999 to August 2020). Due to the lack of an existing life engagement score within the database, GAF was used as a proxy to life engagement for validation due to past research showing a correlation between functioning (i.e., captured by GAF) and life engagement (Weiss et al., 2020).

Bivariate analysis was performed on all clinical labels by fitting a linear regression. Clinical labels whose *p*-values met the significance level of 0.01 were deemed relevant and significant for the multivariable linear regression model. Variance inflation factor (VIF) was then used to identify multicollinearity between clinical labels selected from the previous step. Clinical labels with high VIF were excluded to reduce multicollinearity, and VIF was assessed after exclusion to ensure that the multicollinearity level was acceptable. Linear mixed-effects (LME) models were then trained using the data. The 59 clinical labels identified after bivariate analysis and multicollinearity examination were used as the independent variable in a linear mixed-effects (LME) model with the corresponding GAF score used as the dependent variable. The LME model was fitted to better identify clinical labels relevant to GAF after accounting for the relationship between clinical labels. *P-*values, obtained from the LME model for all relevant clinical labels identified, were used to assess the statistical significance of the regression estimates obtained. 54 clinical labels whose *p*-values meet the significance level of 0.01 were deemed relevant and significant for life engagement. These 54 clinical labels formed the set of clinical labels used for the life engagement proxy scores. The results of the LME model using the 59 labels are described in the table below.

**Supplementary Table 5**
Results of LME model and VIF for 59 clinical labels in the multivariable analysis

| **Label** | **Domain** | **Weight Assigned** | **Regression Estimate** | ***p*** | **VIF** |
| --- | --- | --- | --- | --- | --- |
| Mood - improved | Emotional | 2 | -0.411 | <0.001 | 1.10 |
| Mood - anxious/fearful/ declined | Emotional | -1 | -0.558 | <0.001 | 1.46 |
| Mood - agitated/restless | Emotional/ Physical | -2 | -0.927 | <0.001 | 1.24 |
| Mood - irritable/angry | Emotional | -3 | -0.705 | <0.001 | 1.16 |
| Mood - aggressive | Emotional | -4 | -0.720 | <0.001 | 1.02 |
| Energy - tearful/depressed/sad | Emotional/ Social | -1 | -0.574 | <0.001 | 2.20 |
| Energy - bright/positive | Emotional | 1 | -0.495 | <0.001 | 1.21 |
| Energy - expansive/overly animated | Emotional | -2 | -0.502 | <0.001 | 1.02 |
| Attitude - bad/inappropriate/declined | Social | -1 | -0.631 | <0.001 | 2.39 |
| Affect - labile | Emotional | -2 | -0.650 | <0.001 | 1.09 |
| Affect - blunted/constricted/ inappropriate | Emotional/ Physical | -1 | -0.893 | <0.001 | 1.45 |
| Affect - good/improved | Emotional | 1 | -0.641 | <0.001 | 1.01 |
| Affect - reactive | Emotional | -2 | -0.719 | <0.001 | 1.01 |
| Affect - intense | Emotional | -3 | -0.280 | <0.001 | 1.02 |
| Low energy - present | Physical | -1 | 0.285 | 0.036 | 1.01 |
| Eye contact - bad | Social | -2 | -0.776 | <0.001 | 1.13 |
| General health - bad | Physical | -1 | -0.603 | <0.001 | 1.08 |
| General health - good | Physical | 1 | 0.303 | <0.001 | 2.79 |
| General behavior - bad | Social | -2 | -1.123 | <0.001 | 1.04 |
| General behavior - good | Social | 2 | 0.344 | <0.001 | 2.90 |
| Grooming/hygiene - bad | Social/ Physical | -1 | -1.189 | <0.001 | 1.35 |
| Grooming/hygiene - good | Social/ Physical | 1 | -0.119 | <0.001 | 3.49 |
| Dress - bad | Social | -1 | -0.751 | <0.001 | 1.12 |
| Dress - good | Social | 1 | 0.085 | <0.001 | 2.02 |
| Gait - issues | Physical | -1 | 0.172 | 0.092 | 1.49 |
| impulse control - some issues | Emotional | -1 | -1.511 | <0.001 | 1.02 |
| impulse control - serious | Emotional | -2 | -2.362 | <0.001 | 1.01 |
| Executive functioning - improved | Cognitive | 1 | -3.501 | <0.001 | 1.00 |
| Executive functioning - some impairment | Cognitive | -1 | -0.454 | <0.001 | 1.13 |
| Psychomotor - retarded | Cognitive | -1 | -0.799 | <0.001 | 1.14 |
| Psychomotor - tremors/ticks/involuntary movement | Cognitive | -1 | -0.099 | 0.087 | 1.03 |
| Psychomotor - misc issues | Cognitive | -1 | -0.554 | <0.001 | 1.11 |
| Conscious - sleepy | Physical | -1 | -0.823 | <0.001 | 1.06 |
| Conscious - impaired | Physical | -1 | -2.705 | <0.001 | 1.00 |
| Conscious - clouded | Physical | -1 | -1.341 | <0.001 | 1.01 |
| Conscious - catatonic | Physical | -1 | -1.418 | 0.001 | 1.00 |
| Orientation - situation not ok | Cognitive | -1 | -0.658 | 0.069 | 1.00 |
| Concentration - issues - present | Cognitive | -1 | -0.846 | <0.001 | 1.14 |
| Attention-issues - present | Cognitive | -1 | -0.146 | <0.001 | 2.30 |
| Memory - bad | Cognitive | -1 | 1.625 | <0.001 | 1.20 |
| Reasoning - impaired | Cognitive | -1 | -1.004 | <0.001 | 1.08 |
| Reasoning - concrete/improved | Cognitive | 2 | -0.527 | <0.001 | 2.92 |
| Reasoning - issues due to DD1 | Cognitive | -1 | -0.697 | 0.075 | 1.01 |
| Insight - bad | Cognitive | -1 | -0.347 | <0.001 | 2.96 |
| Thought process - circumstantial | Cognitive | -1 | -1.988 | <0.001 | 1.04 |
| Thought process - loose | Cognitive | -1 | -1.692 | <0.001 | 1.04 |
| Thought process - tangential | Cognitive | -1 | -1.560 | 0.001 | 1.05 |
| Though process - general issues | Cognitive | -1 | -1.223 | <0.001 | 1.19 |
| Thought process - not age-appropriate | Cognitive | -1 | -0.551 | <0.001 | 1.52 |
| Fund of knowledge - bad/inappropriate | Cognitive | -1 | -0.526 | <0.001 | 1.04 |
| Language - impaired | Cognitive | -1 | -0.327 | <0.001 | 1.02 |
| Language - minimally verbal | Cognitive | -2 | -0.557 | <0.001 | 1.11 |
| Language - non-verbal/mute | Cognitive | -3 | -1.264 | <0.001 | 1.02 |
| Speech - rate issues | Cognitive | -1 | -0.483 | <0.001 | 1.21 |
| Speech - volume issues | Cognitive | -1 | -0.607 | <0.001 | 1.17 |
| Speech - stutter/lisp | Cognitive | -1 | -0.407 | 0.002 | 1.01 |
| Speech - misc issues | Cognitive | -1 | -0.421 | <0.001 | 1.15 |
| Speech - impoverished | Cognitive | -1 | -0.446 | <0.001 | 1.09 |

1 DD = Developmental Disorder

## Section S3: List of psychiatric diagnosis codes

**Supplementary Table 6**
ICD-9 and ICD-10 diagnosis codes for identification of patients in NeuroDB.

| **Condition Name** | **Diagnosis Codes** |
| --- | --- |
| Major Depressive Disorder (MDD) | **ICD-10-CM:** F32.0, F32.1, F32.2, F32.3, F32.4, F32.5, F32.81, F32.89, F32.9, F33.0, F33.1, F33.2, F33.3, F33.40, F33.41, F33.42, F33.8, F33.9  **ICD-9-CM:** 296.20, 296.21, 296.22, 296.23, 296.24, 296.25, 296.26, 296.30, 296.31, 296.32, 296.33, 296.34, 296.35, 296.36 |
| Bipolar disorder | **ICD-10-CM:** F30.0, F30.1, F30.2, F30.8, F30.9, F31.0, F31.10, F31.11, F31.12, F31.13, F31.2, F31.30, F31.31, F31.32, F31.4, F31.5, F31.60, F31.61, F31.62, F31.63, F31.64, F31.70, F31.71, F31.72, F31.73, F31.74, F31.75, F31.76, F31.77, F31.78, F31.81, F31.89, F31.9  **ICD-9-CM:** 296.00, 296.01, 296.4, 296.41, 296.42, 296.43, 296.44, 296.45, 296.46, 296.50, 296.51, 296.52, 296.53, 296.54, 296.55, 296.56, 296.60, 296.61, 296.62, 296.63, 296.64, 296.65, 296.66, 296.7, 296.80, 296.89 |
| Anxiety disorder | **ICD-10-CM:** F40.00, F40.01, F40.02, F40.10, F40.11, F40.210, F40.218, F40.220, F40.228, F40.230, F40.231, F40.232, F40.233, F40.240, F40.241, F40.242, F40.243, F40.248, F40.290, F40.291, F40.298, F40.8, F40.9, F41.0, F41.1, F41.9, F42.2, F42.3, F42.4, F42.8, F42.9  **ICD-9-CM:** 300.01, 300.02, 300.20, 300.21, 300.22, 300.23, 300.29, 300.3 |
| Schizophrenia & schizoaffective disorder | **ICD-10-CM:** F20.1, F20.0, F20.2, 295.35, F20.3, F20.5, F20.81, F20.89, F20.9, F25.0, F25.1, F25.8, F25,9  **ICD-9-CM:** 295.0, 295.01, 295.02, 295.03, 295.04, 295.05, 295.1, 295.11, 295.12, 295.13, 295.14, 295.15, 295.2, 295.21, 295.22, 295.23, 295.24, 295.25, 295.3, 295.31, 295.32, 295.33, 295.34, 295.4, 295.41, 295.42, 295.43, 295.44, 295.45, 295.5, 295.51, 295.52, 295.53, 295.54, 295.55, 295.6, 295.61, 295.62, 295.63, 295.64, 295.65, 295.8, 295.81, 295.82, 295.83, 295.84, 295.85, 295.9, 295.91, 295.92, 295.93, 295.94, 295.95, 295.70, 295.71, 295.72, 295.73, 295.74. 295.75 |
| Substance-related disorder | **ICD-10-CM:** F10.10, F10.11, F10.120, F10.121, F10.129, F10.14, F10.150, F10.151, F10.159, F10.180, F10.181, F10.182, F10.188, F10.19, F10.20, F10.21, F10.220, F10.221, F10.229, F10.230, F10.231, F10.232, F10.239, F10.24, F10.250, F10.251, F10.259, F10.26, F10.27, F10.280, F10.281, F10.282, F10.288, F10.29, F10.920, F10.921, F10.929, F10.94, F10.950, F10.951, F10.959, F10.96, F10.97, F10.980, F10.981, F10.982, F10.988, F10.99, F11.10, F11.11, F11.120, F11.121, F11.122, F11.129, F11.14, F11.150, F11.151, F11.159, F11.181, F11.182, F11.188, F11.19, F11.20, F11.21, F11.220, F11.221, F11.222, F11.229, F11.23, F11.24, F11.250, F11.251, F11.259, F11.281, F11.282, F11.288, F11.29, F11.90, F11.920, F11.921, F11.922, F11.929, F11.93, F11.94, F11.950, F11.951, F11.959, F11.981, F11.982, F11.988, F11.99, F12.10, F12.11, F12.120, F12.121, F12.122, F12.129, F12.150, F12.151, F12.159, F12.180, F12.188, F12.19, F12.20, F12.21, F12.220, F12.221, F12.222, F12.229, F12.250, F12.251, F12.259, F12.280, F12.288, F12.29, F12.90, F12.920, F12.921, F12.922, F12.929, F12.950, F12.951, F12.959, F12.980, F12.988, F12.99, F13.10, F13.11, F13.120, F13.121, F13.129, F13.14, F13.150, F13.151, F13.159, F13.180, F13.181, F13.182, F13.188, F13.19, F13.20, F13.21, F13.220, F13.221, F13.229, F13.230, F13.231, F13.232, F13.239, F13.24, F13.250, F13.251, F13.259, F13.26, F13.27, F13.280, F13.281, F13.282, F13.288, F13.29, F13.90, F13.920, F13.921, F13.929, F13.930, F13.931, F13.932, F13.939, F13.94, F13.950, F13.951, F13.959, F13.96, F13.97, F13.980, F13.981, F13.982, F13.988, F13.99, F14.10, F14.11, F14.120, F14.121, F14.122, F14.129, F14.14, F14.150, F14.151, F14.159, F14.180, F14.181, F14.182, F14.188, F14.19, F14.20, F14.21, F14.220, F14.221, F14.222, F14.229, F14.23, F14.24, F14.250, F14.251, F14.259, F14.280, F14.281, F14.282, F14.288, F14.29, F14.90, F14.920, F14.921, F14.922, F14.929, F14.94, F14.950, F14.951, F14.959, F14.980, F14.981, F14.982, F14.988, F14.99, F15.10, F15.11, F15.120, F15.121, F15.122, F15.129, F15.14, F15.150, F15.151, F15.159, F15.180, F15.181, F15.182, F15.188, F15.19, F15.20, F15.21, F15.220, F15.221, F15.222, F15.229, F15.23, F15.24, F15.250, F15.251, F15.259, F15.280, F15.281, F15.282, F15.288, F15.29, F15.90, F15.920, F15.921, F15.922, F15.929, F15.93, F15.94, F15.950, F15.951, F15.959, F15.980, F15.981, F15.982, F15.988, F15.99, F16.10, F16.11, F16.120, F16.121, F16.122, F16.129, F16.14, F16.150, F16.151, F16.159, F16.180, F16.183, F16.188, F16.19, F16.20, F16.21, F16.220, F16.221, F16.229, F16.24, F16.250, F16.251, F16.259, F16.280, F16.283, F16.288, F16.29, F16.90, F16.920, F16.921, F16.929, F16.94, F16.950, F16.951, F16.959, F16.980, F16.983, F16.988, F16.99, F17.200, F17.201, F17.203, F17.208, F17.209, F17.210, F17.211, F17.213, F17.218, F17.219, F17.220, F17.221, F17.223, F17.228, F17.229, F17.290, F17.291, F17.293, F17.298, F17.299, F18.10, F18.11, F18.120, F18.121, F18.129, F18.14, F18.150, F18.151, F18.159, F18.17, F18.180, F18.188, F18.19, F18.20, F18.21, F18.220, F18.221, F18.229, F18.24, F18.250, F18.251, F18.259, F18.27, F18.280, F18.288, F18.29, F18.90, F18.920, F18.921, F18.929, F18.94, F18.950, F18.951, F18.959, F18.97, F18.980, F18.988, F18.99, F19.10, F19.11, F19.120, F19.121, F19.122, F19.129, F19.14, F19.150, F19.151, F19.159, F19.16, F19.17, F19.180, F19.181, F19.182, F19.188, F19.19, F19.20, F19.21, F19.220, F19.221, F19.222, F19.229, F19.230, F19.231, F19.232, F19.239, F19.24, F19.250, F19.251, F19.259, F19.26, F19.27, F19.280, F19.281, F19.282, F19.288, F19.29, F19.90, F19.920, F19.921, F19.922, F19.929, F19.930, F19.931, F19.932, F19.939, F19.94, F19.950, F19.951, F19.959, F19.96, F19.97, F19.980, F19.981, F19.982, F19.988, F19.99  **ICD-9-CM:** , 291.0, 291.1, 291.2, 291.3, 291.4, 291.5, 291.81, 291.82, 291.89, 291.9, 292.0, 292.11, 292.12, 292.2, 292.81, 292.82, 292.83, 292.84, 292.85, 292.89, 292.9, 303.00, 303.01, 303.02, 303.03, 303.90, 303.91, 303.92, 303.93, 304.00, 304.01, 304.02, 304.03, 304.10, 304.11, 304.12, 304.13, 304.20, 304.21, 304.22, 304.23, 304.30, 304.31, 304.32, 304.33, 304.40, 304.41, 304.42, 304.43, 304.50, 304.51, 304.52, 304.53, 304.60, 304.61, 304.62, 304.63, 304.70, 304.71, 304.72, 304.73, 304.80, 304.81, 304.82, 304.83, 304.90, 304.91, 304.92, 304.93, 305.00, 305.01, 305.02, 305.03, 305.1, 305.20, 305.21, 305.22, 305.23, 305.30, 305.31, 305.32, 305.33, 305.40, 305.41, 305.42, 305.43, 305.50, 305.51, 305.52, 305.53, 305.60, 305.61, 305.62, 305.63, 305.70, 305.71, 305.72, 305.73, 305.80, 305.81, 305.82, 305.83, 305.90, 305.91, 305.92, 305.93 |
| Trauma-related disorder | **ICD-10-CM:** F43.10, F43.11, F43.12, F F43.20, F43.21, F43.22, F43.23, F43.24, F43.25, F43.29  **ICD-9-CM:** 309.0, 309.1, 309.24, 309.28, 309.29, 309.3, 309.4, 309.81, 309.9 |
| Neurodevelopmental disorder | **ICD-10-CM:** F70, F71, F72, F73, F78, F79, F80.0, F80.1, F80.2, F80.4, F80.81, F80.82, F80.89, F80.9, F81.0, F81.2, F81.81, F81.89, F81.9, F82, F84.0, F84.2, F84.3, F84.5, F84.8, F84.9, F88, F89, F90.0, F90.1, F90.2, F90.8, F90.9  **ICD-9-CM:** 299.00, 299.01, 299.10, 299.11, 299.80, 299.81, 299.90, 299.91, 314.00, 314.01, 315.00, 315.01, 315.02, 315.09, 315.1, 315.2, 315.31, 315.34, 315.35, 315.39, 315.4, 315.5, 315.8, 315.9, 317.0, 318.0, 318.1, 318.2, 319 |

## Section S4: Handling of prescription data in NeuroDB

Prescription data within NeuroDB contains both the start and end dates. Most patients (52.8%) prescribed brexpiprazole had only one prescription, while the remaining had more than one prescription. Prescription records in real-world datasets are subject to errors and inconsistencies in multiple ways. Among other reasons, this is because, in the real world, patients may return to the clinic before the end of their prescription and are given another prescription before finishing the course of the previous prescription.

To handle these issues, for patients with multiple prescriptions of brexpiprazole, the following procedure was used for each patient to determine the length of the prescription, assumed as the total length of brexpiprazole treatment that the patient undergoes:

1. All prescriptions that overlap in time were merged and considered a single continuous prescription.
2. In cases where the end date of a prescription and the start date of subsequent prescription differ by 30 days or less, the two prescriptions were merged and considered a single prescription. Patients with prescription gaps of more than 30 days were excluded from the study.
3. The previous steps were repeated until all possible contiguous prescriptions had been merged.
4. At the end of this procedure, the first prescription resulting from all the merge events was considered. If the first prescription had a prescription duration of at least 30 days, the patient was considered for inclusion within the study cohort, subject to meeting the other inclusion/exclusion criteria.

## Section S5: Patient Attrition Flowchart

**Supplementary Figure 2**Patient attrition flowchart


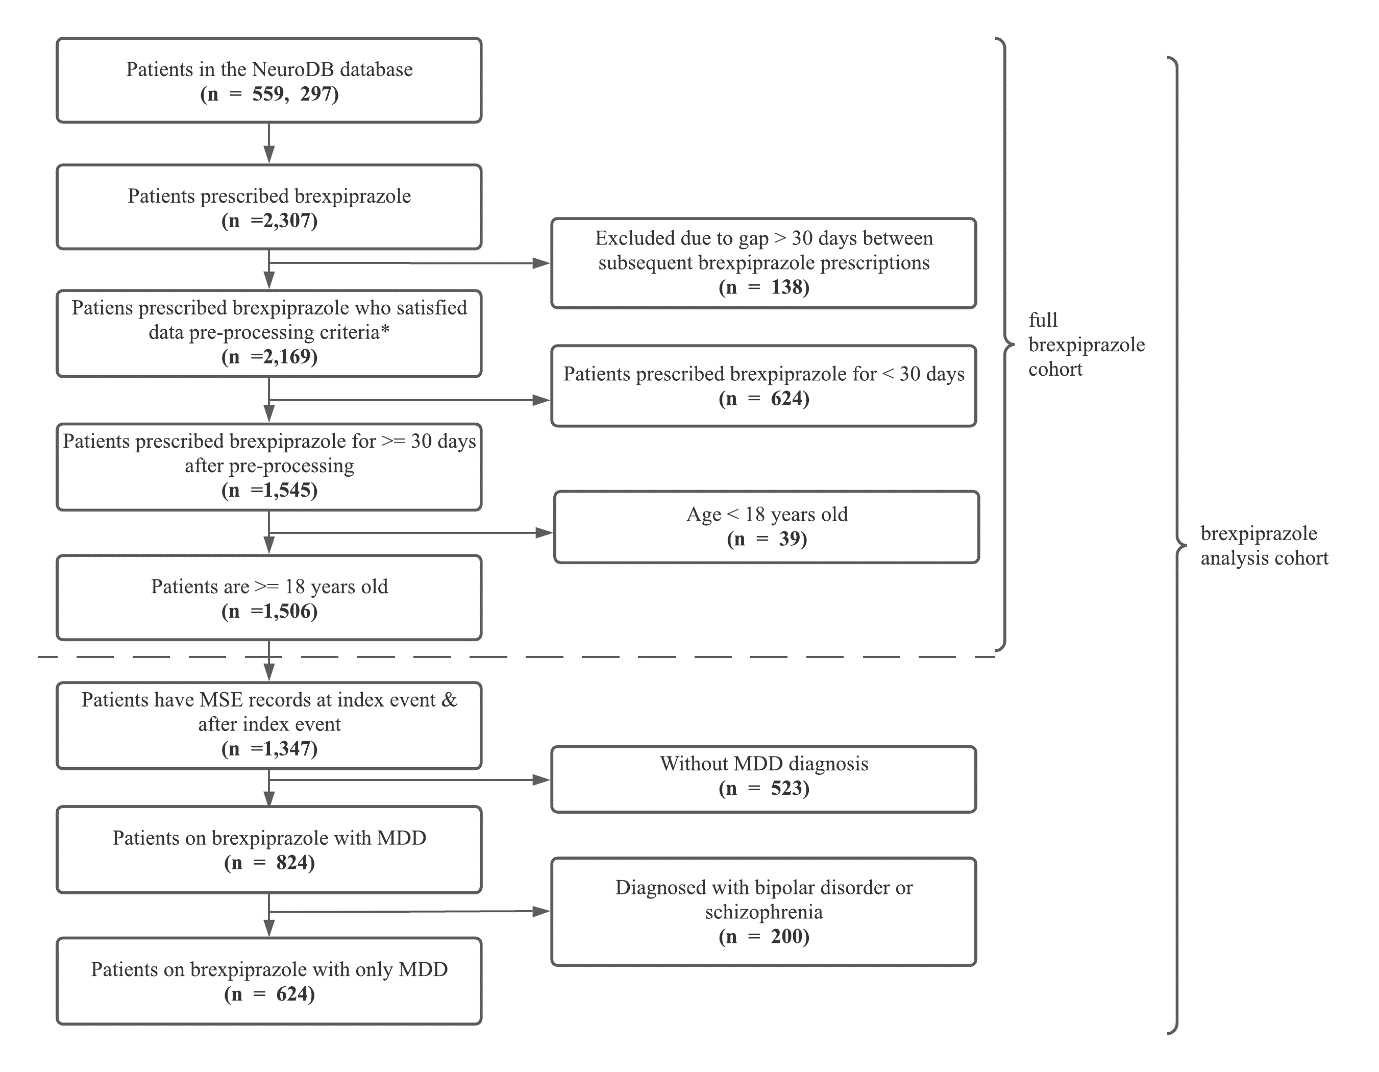


**Section S6: Derivation and normalization of a life engagement score**

**The life engagement score (LES) variable was computed** using the weighted sum of the 54 clinical labels identified in the previous section. The score is defined as a weighted sum of the indicator variables of the set of identified clinical labels, which can be represented by the equation below:

The weights (…) are values assigned to the individual labels based on how these labels are related to the degree of impairment or improvement in life engagement outcomes in patients, as discussed with key opinion leaders in psychiatry. The weights assigned to each clinical label can be found for all 86 clinical labels in Supplementary Table 5 within this supplementary material and for the 54 clinical labels identified in Supplementary Table 6 within this supplementary material.

The change in the life engagement score from the score at baseline (∆) was computed and normalized by the theoretical range of the LES.

Change in LES for the *i*-th patient at the *k*-th timepoint will be calculated by subtracting the LES calculated for each patient at baseline () as defined below.

The theoretical range of the LES was defined as the difference between the theoretical maximum and minimum sum of weights assigned to the clinical labels, which were identified from the LMEM model step. This maximum and minimum would be the sum of all the positive weights () & negative weights (), respectively.

Change in LES for the *i*-th patient at the *k*-th timepoint was then normalized by the theoretical range of the LES.

The relevance of each domain to the change in life engagement levels of a patient used the LES computed using only clinical labels within the 54 clinical labels selected that belong to the respective domain. These scores were then normalized to generate a normalized domain LES.
